# Supplementary material
Source: Springer Nature journal article supplement (https://www.springermedizin.de/resource/supplementary/12883_2013_1146_MOESM1_ESM.pdf/9456548)
Supplement: MOESM1 [file 9456548]

## **Interview Guide for Individuals with Traumatic Spinal Cord Injury**

### **A. Background Information**

Date of Interview:

Time of Interview:

Thank the individual for participating, go over consent form and have him/her verbally agree to participate, explain process, how confidentiality and anonymity will be protected, etc.

Underscore the fact that we are having a conversation; it is *his or her* experiences and input that are important. Underscore that they don't have to answer any questions that they are uncomfortable answering.

### **B. Warm-up and Establishing Rapport**

- It would be nice if you could let me know a little about yourself [this information may have been obtained ahead of time]:
  - How the injury occurred (mechanism of injury) and when he or she sustained his or her injury
  - Level of injury
  - Age
  - Race/ethnicity
  - Marital status
  - Number of children
  - Living situation
  - Dwelling status i.e., house or apartment?
  - Rural/urban status
  - Education: less than high school, high school, undergraduate, postgraduate.

- Employment status
- Individual and family income: <\$20,000, \$20-40K, \$40-60K, \$60-80K, \$80-100K, \$100K+
- Insurance Status

### **C. Barriers and Facilitators of Self-Management**

1. What are some of the factors that have contributed to success in self-management (**self-care activities which promote wellness or activities or strategies that you do to keep yourself healthy and/or manage or prevent secondary complications**)?
2. What are some of the factors that have impeded success in self-management (**self-care activities which promote wellness or activities or strategies that you do to keep yourself healthy and/or manage or prevent secondary complications**)?

### **D. Secondary Complications and Health Care Utilization**

1. What are you currently doing to prevent any secondary complications, **that is, any medical conditions that arise as a result of your spinal cord injury, such as urinary tract infections or pressure ulcers**?
2. What prompted your last visit to hospital or your physician's office? Probes: What was that experience like? Were you comfortable talking to the physician about your health concerns? Did you feel as if you got the answers to all your questions and/or all of your concerns were *addressed*?
3. What kind of *specific* help did you need after that visit (*attendant care, etc.*)? Who or what helped you meet these needs? Was there anything that was not helpful?

### **E. Wrap-up Questions**

- Is there anything else I haven't asked you about that you'd like to add?
- The responses you have provided may stimulate some additional questions or need for further clarification. If so, may we contact you in the future?

## **Interview Guide for Family Members/Caregivers/Attendants of Individuals with Traumatic Spinal Cord Injury**

### **A. Background Information**

Thank the individual for participating, go over consent form and have him/her verbally agree to participate, explain process, how confidentiality and anonymity will be protected, etc.

### **B. Warm-up and Establishing Rapport**

It would be nice if you could let me know a little about yourself [including age, gender, relationship to individual with SCI].

### **C. Barriers and Facilitators of Self-Management**

1a. What are some of the factors that have contributed to success in self-management (of the patient) **(self-care activities which promote wellness or activities or strategies that you do to keep yourself healthy and/or manage or prevent secondary complications)?**

1b. What are some of the factors that have contributed to success in *your own* self-management **(self-care activities which promote wellness or activities or strategies that you do to keep yourself healthy and/or manage or prevent secondary complications)?**

2a. What are some of the factors that have impeded success in self-management (of the patient) **(self-care activities which promote wellness or activities or strategies that you do to keep yourself healthy and/or manage or prevent secondary complications)?**

2b. What are some of the factors that have impeded success in *your own* self-management **(self-care activities which promote wellness or activities or strategies that you do to keep yourself healthy and/or manage or prevent secondary complications)?**

### **D. Secondary Complications and Health Care Utilization**

1. What are you currently doing to help the patient [insert name] prevent any secondary complications, **that is, any medical conditions that arise as a result of your spinal cord injury, such as urinary tract infections or pressure ulcers?**

2. What prompted the patient's [insert patient's name] last visit to hospital physician's office?

Probes: What was that experience like? Was [insert patient's name] comfortable talking to the physician about his/her health concerns? Did he/she feel as if he/she got the answers to all his/her questions and/or all of the concerns were *addressed*? What kind of help did he/she need

after that visit? Who or what helped to meet these needs? Was there anything that was not helpful?

**E. Wrap-up Questions**

- Is there anything else I haven't asked you about that you'd like to add?
- The responses you have provided may stimulate some additional questions or need for further clarification. If so, may we contact you in the future?

## **Interview Guide for Rehabilitation and Acute Care Managers in Ontario**

### **A. Background Information**

Date of Interview:

Time of Interview:

Thank the individual for participating, go over the consent form with him/her and have him/her verbally agree to participate, explain process, how confidentiality and anonymity will be protected, etc. Underscore the fact that we are having a conversation; it is *his or her* experiences and input that are important. Underscore that they don't have to answer any questions that they are uncomfortable answering.

### **B. Warm-up and Establishing Rapport**

- It would be nice if you could let me know a little about yourself [this information may have been obtained ahead of time]:
  - Position
  - Number of years in position
  - Age
  - Sex
  - Rehabilitation or acute Care?
  - Number of patients on unit/in program/number of beds

### **C. Barriers and Facilitators of Self-Management**

1. What could be added to your program to assist patients with self-management support/skills?

**Probes: Any barriers, any facilitators to making this addition at the individual, provider, and/or policy levels?**

2. What do you believe are the facilitators to self-management for patients in the community?

**Probes: Again at the individual, provider, and/or policy levels?**

3. What do you believe are the barriers to self-management for patients in the community?

**Probes: Again at the individual, provider, and/or policy levels?**

4. What could be added to your program to assist family members or caregivers with self-management support/skills? **Probes: Any barriers, any facilitators to making this addition at the individual, provider, and/or policy levels?**

5. In your opinion, what facilitates self-management for family members or caregivers in the community? **Probes: Again at the individual, provider, and/or policy levels?**

6. What do you believe are the barriers to self-management for family members or caregivers in the community? **Probes: Again at the individual, provider, and/or policy levels?**

#### **D. Wrap-up Questions**

- Is there anything else I haven't asked you about that you'd still like to add regarding self-management programs?
- The responses you have provided may stimulate some additional questions or need for further clarification. If so, may we contact you in the future?
